# Supplementary material for: Covalent crosslinking of graphene oxide and carbon nanotube into hydrogels enhances nerve cell responses
Source: Royal Society of Chemistry journal article supplement (doi:10.1039/c6tb01722c), 2016-01-01
Supplement: c6tb01722c1.pdf [file c6tb01722c1.pdf]

## Supplementary Information

### Covalent crosslinking of graphene oxide and carbon nanotube into hydrogels enhances nerve cell responses

Xifeng Liu<sup>ab</sup>, A. Lee Miller II<sup>b</sup>, Sungjo Park<sup>c</sup>, Brian E. Waletzki<sup>b</sup>, Andre Terzic<sup>c</sup>, Michael J. Yaszemski<sup>ab</sup>, Lichun Lu<sup>\*ab</sup>

<sup>a</sup> Department of Physiology and Biomedical Engineering, Mayo Clinic, Rochester, MN 55905, USA

<sup>b</sup> Department of Orthopedic Surgery, Mayo Clinic, Rochester, MN 55905, USA.

<sup>c</sup> Department of Cardiovascular Diseases and Center for Regenerative Medicine, Mayo Clinic, Rochester, MN 55905, USA

\* Corresponding author.

Email address: [Lu.Lichun@mayo.edu](mailto:Lu.Lichun@mayo.edu); Phone: 507-284-2267; Fax: 507-284-5075.

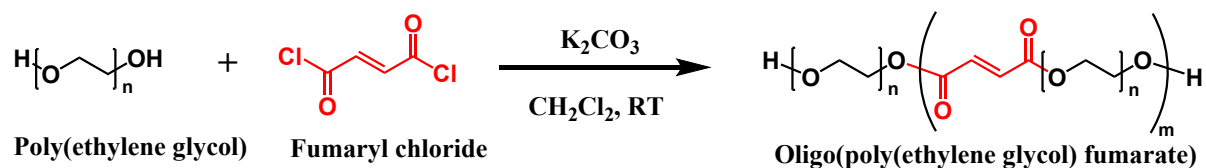

**Fig. S1** Synthesis of OPF polymer by linking poly(ethylene glycol) through fumaryl chloride.
